# Supplementary material
Source: PubMed Central journal article supplement (PMC3203651)
Supplement: cr2010163x3.pdf [file cr2010163x3.pdf]

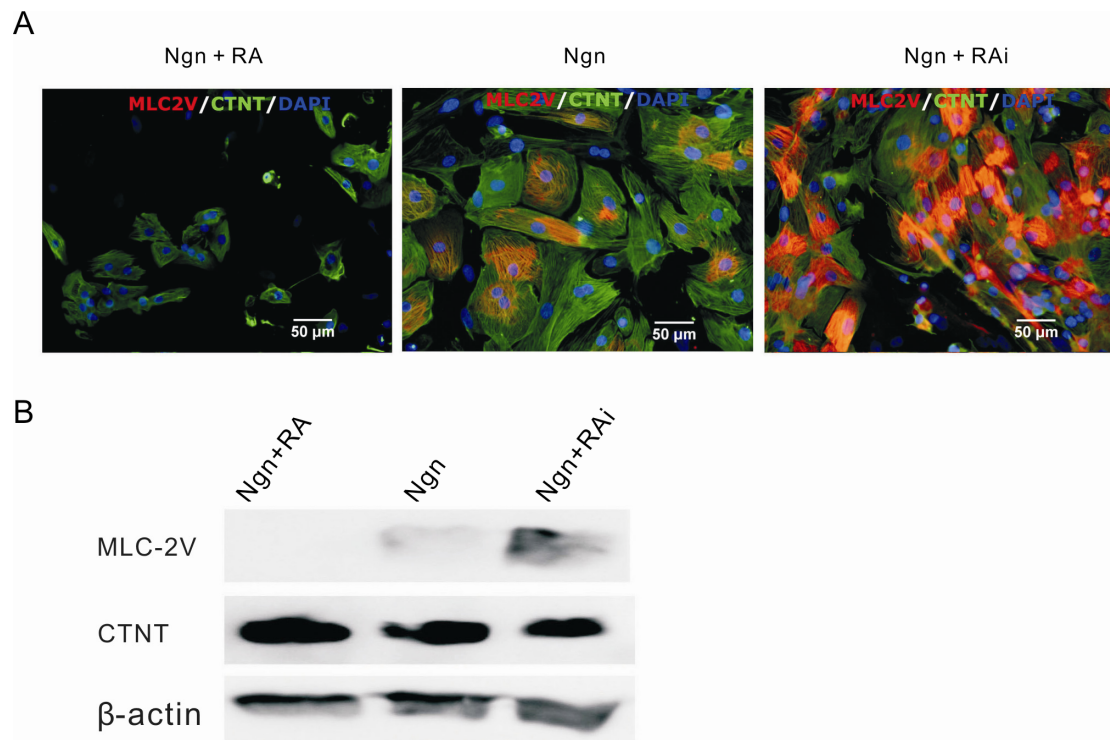

**Supplementary information, Figure S1** MLC-2V expression in different retinoid-treated cultures.

**(A)** MLC-2V and CTNT double staining for 60-day-old cultures treated with Ngn+RA, Ngn alone and Ngn+RAi. **(B)** Western blots for MLC-2V, CTNT and  $\beta$ -actin from 60-day-old cultures treated with Ngn+RA, Ngn alone and Ngn+RAi.
