# Supplementary material
Source: PubMed Central journal article supplement (PMC3203651)
Supplement: cr2010163x4.pdf [file cr2010163x4.pdf]

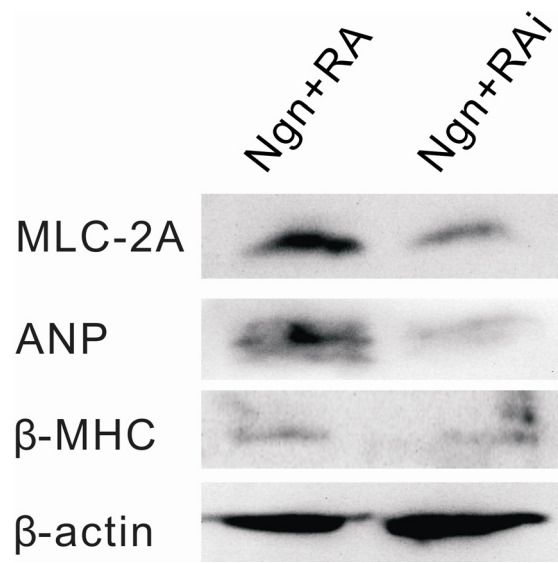

**Supplementary information, Figure S2** Cardiac gene expression in differently treated cultures.

Western blots for MLC-2A, ANF,  $\beta$ -MHC and  $\beta$ -actin with 60-day-old cultures treated with Ngn+RA and Ngn+RAi.
